# Supplementary material for: Bioinformatics Approach to Identify Common Gene Signatures of Patients With Coronavirus 2019 and Lung Adenocarcinoma
Source: Research Square preprint supplement (doi:10.21203/rs.3.rs-880952/v1), 2021-10-29
Supplement: Supplementary file 1 [file 25881835b74764344016f260.docx]

**Supplemental Table 5. Summary of enrichment analysis in COVID.**

| GO | Description | Count | % | Log10(P) | Log10(q) |
| --- | --- | --- | --- | --- | --- |
| [COVID017](https://metascape.org/COVID#200_COVID017) | RNA_Blanco-Melo_Lung_Down | 40 | 36.00 | -52.00 | -48.00 |
| [COVID016](https://metascape.org/COVID#200_COVID016) | RNA_Blanco-Melo_Calu-3_Up | 16 | 14.00 | -13.00 | -9.60 |
| [COVID018](https://metascape.org/COVID#200_COVID018) | RNA_Blanco-Melo_Lung_Up | 10 | 8.90 | -12.00 | -8.50 |
| [COVID020](https://metascape.org/COVID#200_COVID020) | RNA_Blanco-Melo_NHBE_Up | 10 | 8.90 | -12.00 | -8.40 |
| [COVID203](https://metascape.org/COVID#200_COVID203) | RNA_Vanderheiden_pHAE_48h_Up | 11 | 9.80 | -10.00 | -7.40 |
| [COVID032](https://metascape.org/COVID#200_COVID032) | RNA_Liao_BALF-severe_Up | 13 | 12.00 | -9.60 | -6.70 |
| [COVID356](https://metascape.org/COVID#200_COVID356) | RNA_Zhang_NK-cells_severe-and-moderate_Up | 8 | 7.10 | -8.40 | -5.60 |
| [COVID191](https://metascape.org/COVID#200_COVID191) | RNA_Stukalov_A549-ACE2_24h_Up | 8 | 7.10 | -8.20 | -5.50 |
| [COVID244](https://metascape.org/COVID#200_COVID244) | RNA_Wilk_CD14+Monocytes_patient-C1A-mild_Up | 7 | 6.20 | -7.50 | -4.90 |
| [COVID050](https://metascape.org/COVID#200_COVID050) | RNA_Wyler_Calu-3_24h_Up | 11 | 9.80 | -7.50 | -4.90 |
| [COVID243](https://metascape.org/COVID#200_COVID243) | RNA_Riva_Vero-E6_24h_Up | 11 | 9.80 | -7.50 | -4.90 |
| [COVID359](https://metascape.org/COVID#200_COVID359) | RNA_Zhang_T-cells_severe-and-moderate_Up | 8 | 7.10 | -7.10 | -4.50 |
| [COVID256](https://metascape.org/COVID#200_COVID256) | RNA_Wilk_CD14+Monocytes_patient-C6_Up | 8 | 7.10 | -6.70 | -4.30 |
| [COVID189](https://metascape.org/COVID#200_COVID189) | RNA_Stukalov_A549-ACE2_18h_Up | 6 | 5.40 | -6.60 | -4.20 |
| [COVID347](https://metascape.org/COVID#200_COVID347) | RNA_Wilk_B-cells_patient-C6_Up | 7 | 6.20 | -6.50 | -4.10 |
| [COVID034](https://metascape.org/COVID#200_COVID034) | RNA_Liao_BALF-severe-vs-mild_Up | 10 | 8.90 | -6.50 | -4.10 |
| [COVID193](https://metascape.org/COVID#200_COVID193) | RNA_Stukalov_A549-ACE2_30h_Up | 10 | 8.90 | -6.50 | -4.10 |
| [COVID353](https://metascape.org/COVID#200_COVID353) | RNA_Zhang_Monocytes_severe-and-moderate_Up | 7 | 6.20 | -6.10 | -3.80 |
| [COVID245](https://metascape.org/COVID#200_COVID245) | RNA_Wilk_CD14+Monocytes_patient-C1A-mild_Down | 5 | 4.50 | -5.60 | -3.40 |
| [COVID006](https://metascape.org/COVID#200_COVID006) | RNA_Appelberg_Huh-7_72h_Up | 9 | 8.00 | -5.50 | -3.30 |
